# Supplementary material for: Synthesis, characterization and enhanced gas sensing performance of porous ZnCo2O4 nano/microspheres
Source: Royal Society of Chemistry journal article supplement (doi:10.1039/c5nr05761b), 2015-01-01
Supplement: c5nr05761b1.pdf [file c5nr05761b1.pdf]

# Electronic Supporting Information

Tie Liu,<sup>a</sup> Jingyuan Liu,<sup>\*a</sup> Qi Liu,<sup>a</sup> Dalei Song,<sup>a</sup> Hongseng Zhang,<sup>a</sup> Hongquan Zhang,<sup>a,c</sup> and Jun Wang<sup>\*a,b</sup>

<sup>a</sup> Key Laboratory of Superlight Material and Surface Technology, Ministry of Education, Harbin Engineering University, 150001, PR China.

<sup>b</sup> Institute of Advanced Marine Materials, Harbin Engineering University, 150001, PR China.

<sup>c</sup> School of Automation, Harbin Engineering University, 150001, PR China.

\* Corresponding author: Tel.: +86 451 8253 3026; Fax: +86 451 8253 3026; E-mail: [zhqw1888@sohu.com](mailto:zhqw1888@sohu.com).

## Experimental

### Synthesis of ZCO lamellar cubes

In order to prepare cubic  $\text{ZnCo}_2\text{O}_4$ , 1mmol  $\text{Zn}(\text{NO}_3)_2 \cdot 6\text{H}_2\text{O}$  and 2mmol  $\text{Co}(\text{NO}_3)_2 \cdot 6\text{H}_2\text{O}$  were completely dissolved in ethylene glycol (50ml) to form a transparent solution. Brief, 10mmol  $\text{NH}_4\text{F}$  and some  $\text{Na}_2\text{SO}_4$  were dissolved completely with ethanol (20ml), added to solution above. After ultrasonic and stirred treatments, the final solution was transferred to a Teflon-lined stainless autoclave, which was heated  $180^\circ\text{C}$  for 8h in air flow electric oven. Next, the product was washed by distilled water and ethanol several times prior to being dried at  $60^\circ\text{C}$  for 10h. Finally, the final sample was collected after the calcination process at  $650^\circ\text{C}$  for the gas sensing test further.

Table. s1 Comparisons of BET data of three samples and the response and response/recovery times of three sample-based sensors toward 100 ppm ethanol

| Samples | Materials                 | Structures     | Surface area/<br>$\text{m}^2 \cdot \text{g}^{-1}$ | $T_{\text{Res}} \sim T_{\text{Rec}}/\text{s}$ | Response |
|---------|---------------------------|----------------|---------------------------------------------------|-----------------------------------------------|----------|
| S1      | $\text{ZnCo}_2\text{O}_4$ | microsphere    | 77.3                                              | 5.5~14.3                                      | 19.3     |
| S2      | $\text{ZnCo}_2\text{O}_4$ | lamellar cubic | 24.5                                              | 7.6~19.7                                      | 9.8      |
| S3      | $\text{Co}_3\text{O}_4$   | microsphere    | 42.1                                              | 33.7~16.4                                     | 8.9      |
| S4      | $\text{ZnCo}_2\text{O}_4$ | nanoparticles  | 21.3                                              | 8.9~13.1                                      | 7.1      |

$T_{\text{Res}}$ , response time;  $T_{\text{Rec}}$ , recovery time

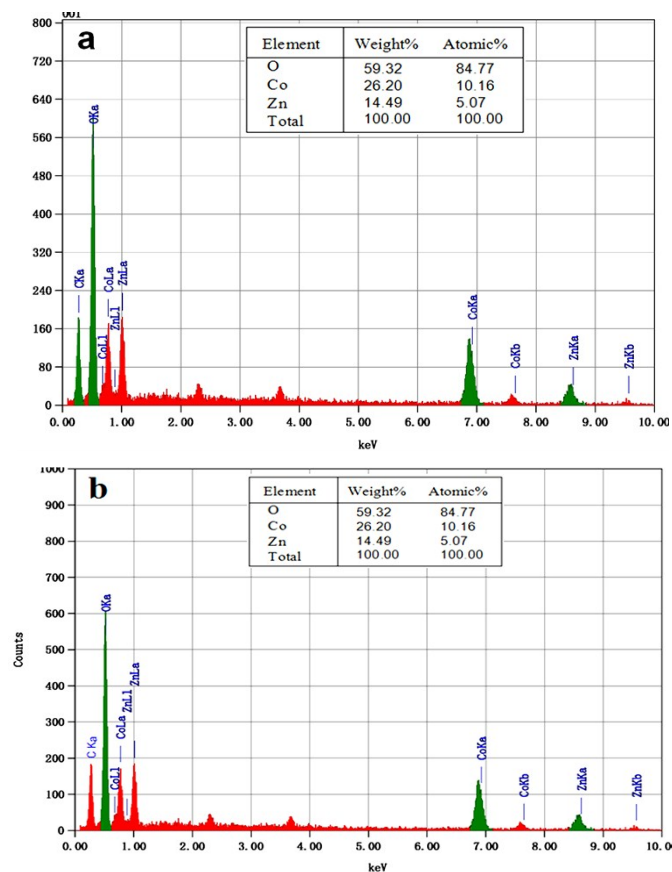

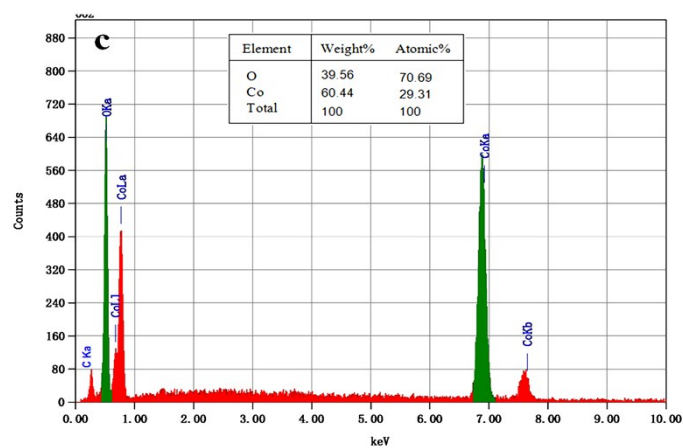

Fig.s1 EDX analysis spectra of S1, S2, S3 (a, b, c, respectively).

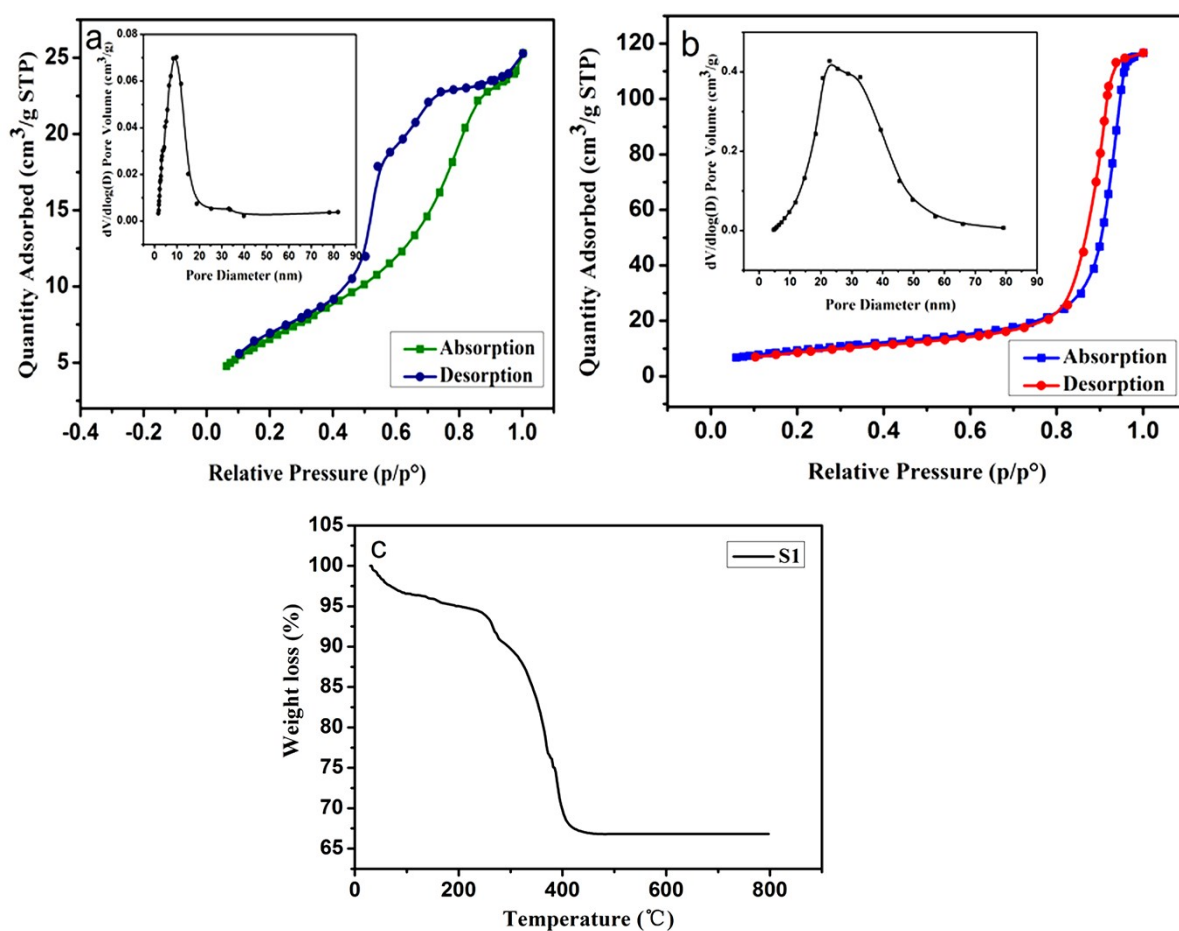

Fig.s2 N<sub>2</sub> adsorption-desorption isotherms and corresponding BJH pore-size distribution plots (inset) of S2, S3 (shown in a, b, respectively), and TGA curve of S1(c).

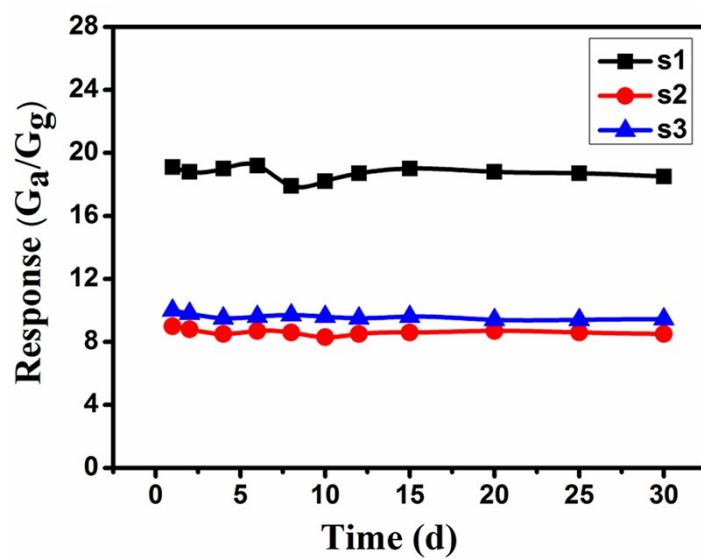

Fig.s3 Long-term stability of sensor based S1, S2, and S3 to 100ppm ethanol at 175°C.

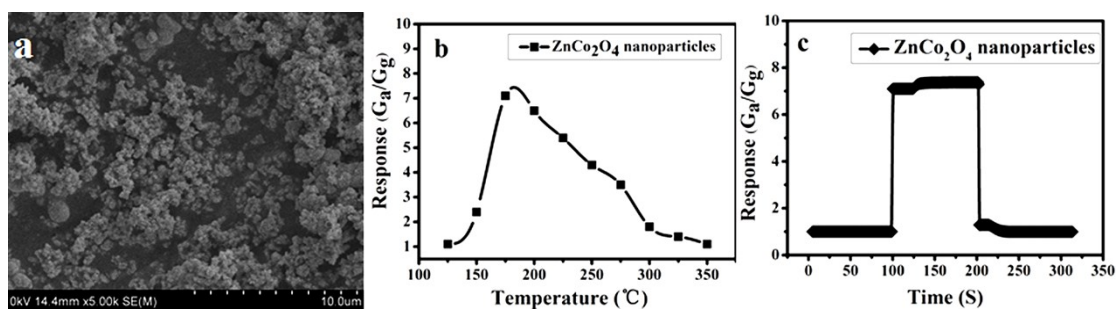

Fig.s4 SEM image of S4 (a), response of sensor based on ZnCo<sub>2</sub>O<sub>4</sub> nanoparticles to 100ppm ethanol (b) and response/recovery times (c).
